# Supplementary material for: Evidence for Weakened Intercellular Coupling in the Mammalian Circadian Clock under Long Photoperiod
Source: PubMed Central journal article supplement (PMC5179103; doi:10.1371/journal.pone.0168954), 2016-12-22
Supplement: pone.0168954.s003.pdf [file pone.0168954.s003.pdf]

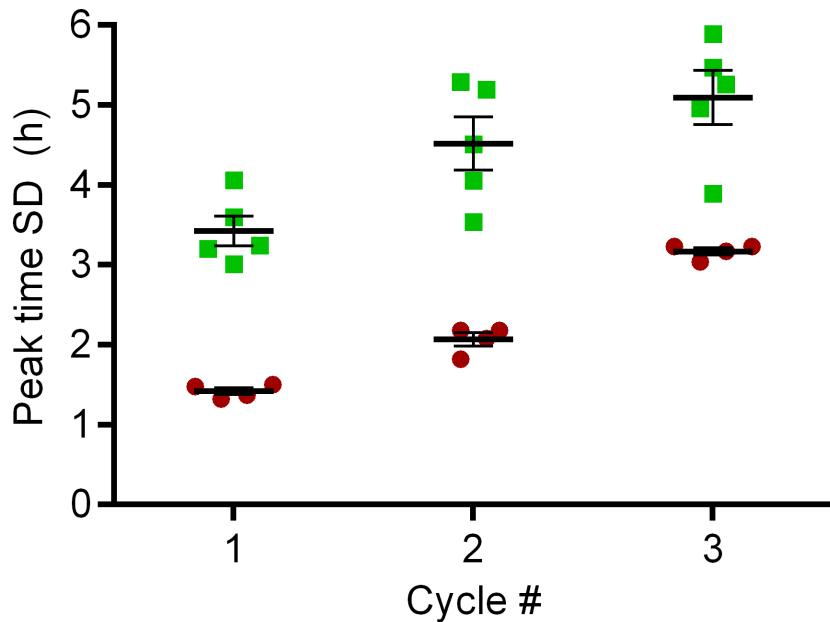

**S3 Fig. Time in culture does not affect photoperiodic induced difference in phase dispersal.** Peak time distribution (SD) was calculated as a measure for phase dispersal for the first three days in culture. Photoperiod effect on phase dispersal did not alter during the time in culture.
