# Supplementary material for: Evidence for Weakened Intercellular Coupling in the Mammalian Circadian Clock under Long Photoperiod
Source: PubMed Central journal article supplement (PMC5179103; doi:10.1371/journal.pone.0168954), 2016-12-22
Supplement: pone.0168954.s004.pdf [file pone.0168954.s004.pdf]

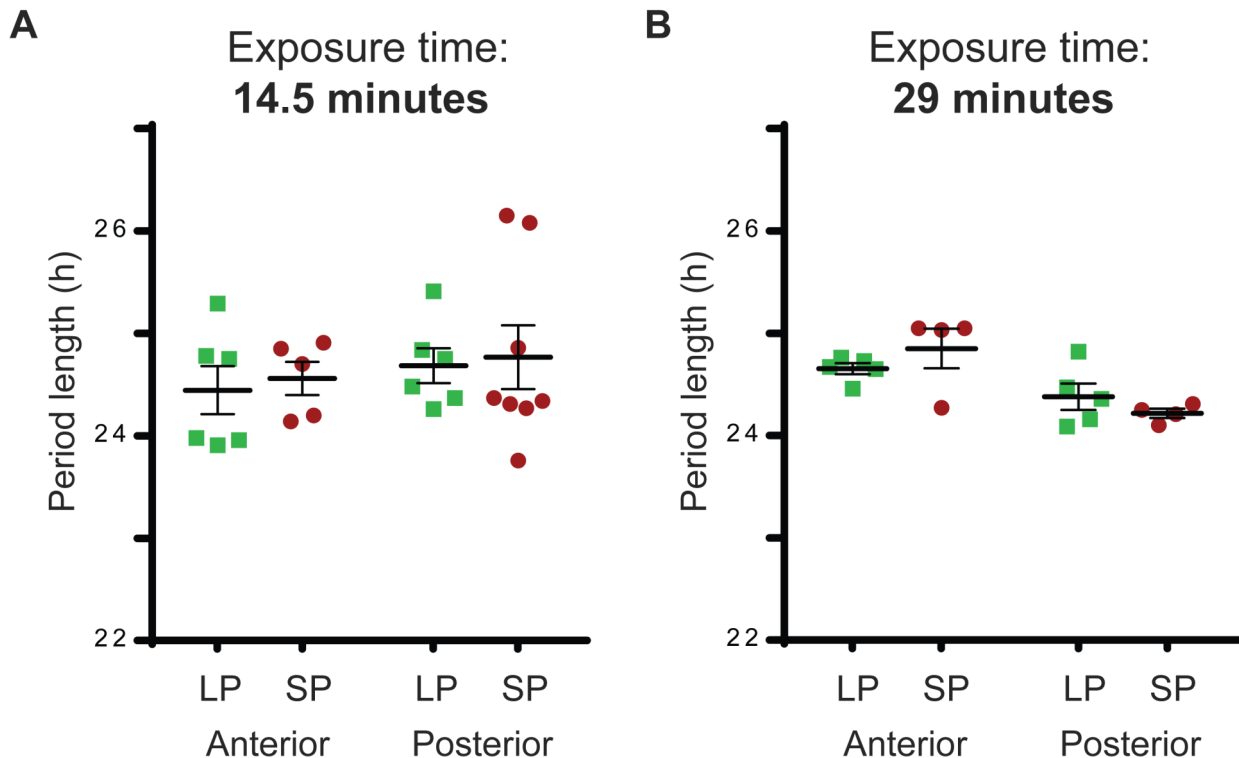

**S4 Fig. Period of the PER2::LUC expression rhythms.** Period was determined over three cycles and averaged per slice, for (A) the experiments with 14.5 minutes exposure time, (B) 29 minutes exposure time. Black bars indicate mean  $\pm$  SEM.
